# Supplementary material
Source: MDPI journal article supplement (https://www.mdpi.com/2411-5142/3/2/26)
Supplement: s1 [file s1]

## Supplementary Material 1

**Table 1.** Resistance training during the cutting phase of Men's Physique 1.

| Monday                                                                       | Tuesday                                                                               | Wednesday                                                                     | Thursday                                                                     | Friday                                                                          | Saturday<br>and<br>Sunday |
|------------------------------------------------------------------------------|---------------------------------------------------------------------------------------|-------------------------------------------------------------------------------|------------------------------------------------------------------------------|---------------------------------------------------------------------------------|---------------------------|
| Chest (3 exercises, 10 sets, 10–15 reps and 45–60'' interval between sets)   | Latissimus dorsi (3 exercises, 10 sets, 10–15 reps and 45–60'' interval between sets) | Hamstring (3 exercises, 9 sets, 10–12 reps and 45–60'' interval between sets) | Biceps (3 exercises, 10 sets, 10–15 reps and 45–60'' interval between sets)  | Quadriceps (3 exercises, 10 sets, 10–15 reps and 45–60'' interval between sets) | Day off                   |
| Deltoids (3 exercises, 8 sets, 10–15 reps and 45–60'' interval between sets) | Trapezius (3 exercises, 6 sets, 10–15 reps and 45–60'' interval between sets)         | Low back (1 exercise, 4 sets, 10–12 reps and 45–60'' interval between sets)   | Triceps (3 exercises, 10 sets, 10–15 reps and 45–60'' interval between sets) | Adductor (1 exercise, 4 sets, 12 reps and 45–60'' interval between sets)        |                           |
| Calves (2 exercise, 8 sets, 20 reps and 45–60'' interval between sets)       | Posterior deltoid (1 exercise, 4 sets, 12 reps and 45–60'' interval between sets)     | Abdominals (1 exercise, 4 sets, 20 reps and 45–60'' interval between sets)    | Calves (2 exercises, 8 sets, 20 reps and 45–60'' interval between sets)      | Abdominals (1 exercise, 5 sets, 20 reps and 45–60'' interval between sets)      |                           |
| Abdominals (1 exercise, 5 sets, 20 reps and 45–60'' interval between sets)   |                                                                                       |                                                                               |                                                                              |                                                                                 |                           |

Note: sets denote total sets per body part.

## Supplementary Material 2

**Table 2.** Resistance training during the cutting phase of Men's Physique 2.

| Monday                                                                          | Tuesday                                                                                 | Wednesday                                                                       | Thursday                                                                    | Friday                                                                          | Saturday and Sunday                                                             |
|---------------------------------------------------------------------------------|-----------------------------------------------------------------------------------------|---------------------------------------------------------------------------------|-----------------------------------------------------------------------------|---------------------------------------------------------------------------------|---------------------------------------------------------------------------------|
| Chest (5 exercises, with 20 sets, 12–15 reps and 1–2' interval between sets)    | Latissimus dorsi (5 exercises, with 20 sets, 12–15 reps and 1–2' interval between sets) | Quadriceps (1 exercise, with 6 sets, 15–20 reps and 1–2' interval between sets) | Deltoids (4 exercises, 16 sets, 12–15 reps and 1–2' interval between sets)  | Biceps (3 exercises, with 12 sets, 12–15 reps and 1–2' interval between sets)   | 120' of cardio (bicycle or treadmill) at moderate intensity in the fasted state |
| Abdominals (1 exercise, with 4 sets, 15–20 reps and 1–2' interval between sets) | Calves (1 exercise, with 4 sets, 15–20 reps and 1–2' interval between sets)             | Hamstrings (1 exercise, with 6 sets, 15–20 reps and 1–2' interval between sets) | Trapezius (1 exercise, 4 sets, 12–15 reps and 1–2' interval between sets)   | Triceps (3 exercises, with 12 sets, 12–15 reps and 1–2' interval between sets)  |                                                                                 |
|                                                                                 |                                                                                         | 30' of cardio (bicycle or treadmill) at moderate intensity and abdominals       | Calves (1 exercise, with 4 sets, 15–20 reps and 1–2' interval between sets) | Abdominals (1 exercise, with 4 sets, 15–20 reps and 1–2' interval between sets) |                                                                                 |

Note: sets denote total sets per body part. Participant performed 120' of cardio (bicycle or treadmill) at moderate intensity in fasted state prior strength training during week days.

### Supplementary Material 3

**Table 3.** Resistance training during the cutting phase of Woman Wellness.

| Monday                                                                       | Tuesday                                                                        | Wednesday                                                                       | Thursday                                                                     | Friday                                                                                  | Saturday and Sunday                                        |
|------------------------------------------------------------------------------|--------------------------------------------------------------------------------|---------------------------------------------------------------------------------|------------------------------------------------------------------------------|-----------------------------------------------------------------------------------------|------------------------------------------------------------|
| Thigh (5 exercises, with 15 sets, 12–15 reps and 1–2' interval between sets) | Chest (2 exercises, with 6 sets, 12–15 reps and 1–2' interval between sets)    | 15' of aerobic interval training (bicycle or treadmill)                         | Thigh (6 exercises, with 18 sets, 12–15 reps and 1–2' interval between sets) | Latissimus dorsi (5 exercises, with 15 sets, 12–15 reps and 1–2' interval between sets) | 60' of cardio (bicycle or treadmill) at moderate intensity |
|                                                                              | Deltoids (3 exercises, with 6 sets, 12–15 reps and 1–2' interval between sets) | Abdominals (1 exercise, with 7 sets, 15–20 reps and 1–2' interval between sets) |                                                                              | Biceps (1 exercise, with 3 sets, 12–15 reps and 1–2' interval between sets)             |                                                            |
|                                                                              | Triceps (2 exercise, with 6 sets, 12–15 reps and 1–2' interval between sets)   |                                                                                 |                                                                              |                                                                                         |                                                            |

Note: sets denote total sets per body part. Participant performed 60' of cardio (bicycle or treadmill) at moderate intensity prior strength training and more 20' after strength training during week days.

# Supplementary Material 4

**Table 4.** Resistance training during the cutting phase of Woman Bikini.

| Monday                                                                           | Tuesday                                                                       | Wednesday                                                                       | Thursday                                                                      | Friday                                                                                 | Saturday and Sunday                                                            |
|----------------------------------------------------------------------------------|-------------------------------------------------------------------------------|---------------------------------------------------------------------------------|-------------------------------------------------------------------------------|----------------------------------------------------------------------------------------|--------------------------------------------------------------------------------|
| Abdominals (3 exercises, with 9 sets, 15–20 reps and 1–2' interval between sets) | Chest (2 exercises, with 6 sets, 8–12 reps and 1–2' interval between sets)    | 40' of cardio (bicycle or treadmill) at moderate intensity                      | Abductor (1 exercise, with 4 sets, 12–15 reps and 1–2' interval between sets) | Latissimus dorsi (4 exercises, with 15 sets, 8–12 reps and 1–2' interval between sets) | 60' of cardio (bicycle or treadmill) at moderate intensity in the fasted state |
| Quadriceps (3 exercises, with 12 sets, 8–12 reps and 1–2' interval between sets) | Deltoids (3 exercises, with 9 sets, 8–12 reps and 1–2' interval between sets) | Abdominals (3 exercise, with 9 sets, 15–20 reps and 1–2' interval between sets) | Hamstring (2 exercise, with 6 sets, 8–12 reps and 1–2' interval between sets) | Trapezius (1 exercise, with 3 sets, 8–12 reps and 1–2' interval between sets)          |                                                                                |
| Adductor (1 exercise, 4 sets, 12–15 reps and 1–2' interval between sets)         | Triceps (2 exercise, with 6 sets, 8–12 reps and 1–2' interval between sets)   |                                                                                 | Gluteus (2 exercise, with 6 sets, 8–12 reps and 1–2' interval between sets)   | Biceps (2 exercise, with 2 sets, 10 reps and 1–2' interval between sets)               |                                                                                |
| Calves (1 exercise, 4 sets, 15 reps and 1–2' interval between sets)              |                                                                               |                                                                                 | Calves (2 exercise, 6 sets, 15–20 reps and 1–2' interval between sets)        | Abdominals (3 exercise, with 9 sets, 15–20 reps and 1–2' interval between sets)        |                                                                                |

Note: sets denote total sets per body part. Participant performed 60' of cardio (bicycle or treadmill) at moderate intensity after strength training during week days. Participant performed 9 sets of abdominals every day.
